# Supplementary material for: Upscaling instantaneous to daily evapotranspiration using modelled daily shortwave radiation for remote sensing applications: an artificial neural network approach
Source: Copernicus journal article supplement (doi:10.5194/hess-21-197-2017), 2017-01-11
Supplement: Supplementary file 1 [file hess-21-197-2017-supplement.zip]

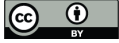

## *Supplement of*

# **Upscaling instantaneous to daily evapotranspiration using modelled daily shortwave radiation for remote sensing applications: an artificial neural network approach**

**Loise Wandera et al.**

*Correspondence to:* Kaniska Mallick ([kaniska.mallick@gmail.com](mailto:kaniska.mallick@gmail.com)) and Loise Wandera ([loise.wandera@list.lu](mailto:loise.wandera@list.lu))

- [hess-21-197-2017-supplement-title-page.pdf](#)
- [Supplementary\\_Train\\_valid.xlsx](#)

The copyright of individual parts of the supplement might differ from the CC-BY 3.0 licence.
