# Supplementary material for: Upscaling instantaneous to daily evapotranspiration using modelled daily shortwave radiation for remote sensing applications: an artificial neural network approach
Source: Copernicus journal article supplement (doi:10.5194/hess-21-197-2017), 2017-01-11
Supplement: Supplementary file 1 [file Supplementary_Train_valid.xlsx]

## Sheet: training
FLUXNET_ID	Year	Lat	Long	PFT	Climate
Training
AU-How	2005	12° 29' S	131° 15' W	Deciduous broadleaf vegetation	Equatorial savannah
BE-Bra	2006	51° 18' N	4° 15' W	Deciduous broadleaf vegetation	Warm temperate humid
BE-Vie	2006	50° 18' N	5° 99' W	Deciduous broadleaf vegetation	Warm temperate humid
Br_Sa3	2002	3° 1' S	54° 98' E	Evergreen Broadleaf vegetation	Equatorial savannah
Br_Sa1	2002	2° 51' S	54° 96' E	Evergreen Broadleaf vegetation	Equatorial savannah
Br_Sal2	2001	3° 0' S	54° 55' E	Evergreen Broadleaf vegetation	Equatorial savannah
BR-Ban	2005	9° 49' S	50° 16' E	Evergreen Broadleaf vegetation	Equatorial savannah
BR-Ji2	2002	10° 4' S	61° 93' E	Evergreen Broadleaf vegetation	Equatorial savannah
BW-Ma1	2000	19° 54' S	23° 56' W	Grassland	Arid Steppe
CA_NSI	2004	55° 52' N	98° 48' E	Evergreen Needleaf vegetation	cold without dry season
CA-NS2	2003	55° 54' N	98° 52' E	Evergreen Needleaf vegetation	cold without dry season
CN-Hab	2004	37° 22' N	101° 18' W	Grassland	Polar tundra
DE_Kli	2005	50° 53' N	13° 52' W	Crops	Warm temperate humid
DE_Meh	2005	51° 16' N	10° 65' W	Crops	Warm temperate humid
DE_Wet	2006	50° 27' N	11° 45' W	Crops	Warm temperate humid
DE-Bay	1999	50° 80' N	11° 86' W	Evergreen Needleaf vegetation	Warm temperate humid
DE-Geb	2006	51° 60' N	10° 91' W	Crops	Warm temperate humid
DE-Gri	2006	50° 56' N	13° 51' W	Deciduous broadleaf vegetation	Warm temperate humid
DE-Hai	2006	51° 40' N	10° 45' W	Deciduous broadleaf vegetation	Warm temperate humid
DK-Fou	2005	56° 29' N	9° 58' W	Crops	Warm temperate humid
DK-Sor	2006	55°29' N	11° 64' W	Deciduous broadleaf vegetation	Warm temperate humid
ES_Lma	2005	39° 56' N	5° 77' E	Deciduous broadleaf vegetation	Warm temperate
ES-ES2	2006	39° 16' N	0° 31' W	Crops	Warm temperate
ES-VDA	2004	42° 90' N	1° 44' W	Shrub	Warm temperate
FI-Hyy	2006	61° 50' N	24° 29' W	Evergreen Needleaf vegetation	Warm temperate humid
FI-Sii	2005	61° 49' N	24° 19' W	Evergreen Needleaf vegetation	cold without dry season
FI-Sod	2006	67° 21' N	26° 63' W	Evergreen Needleaf vegetation	cold without dry season
FR_Gri	2005	48°50' N	1° 95' W	Crops	Warm temperate humid
Fr_Hes	2006	48° 40' N	7° 64' W	Deciduous broadleaf vegetation	Warm temperate humid
FR_Lbr	2005	44° 43' N	0°76' W	Shrub	Warm temperate humid
FR_Lq1	2006	45° 38' N	2° 73' W	Crops	Warm temperate humid
FR-Fon	2006	48° 28' N	2° 78' W	Deciduous broadleaf vegetation	Warm temperate humid
FR-Lam	2005	43° 29' N	1° 23' W	Crops	Warm temperate humid
GF-Guy	2006	5° 16' N	52° 92' E	Evergreen Broadleaf vegetation	Equatorial rainforest
HU-Bug	2006	46° 41' N	19° 60' W	Crops	Warm temperate humid
IE-Ca1	2004	52° 51' N	6° 91' E	Crops	Warm temperate humid
IL-Yat	2006	31° 20' N	35° 51' W	Shrub	Arid Steppe hot
IT-Amp	2006	41° 54' N	13° 60' W	Crops	Warm temperate humid
IT-Bci	2006	40° 31' N	14° 95' W	Crops	Warm temperate humid
IT-Col	2006	41° 50' N	13° 58' W	Deciduous broadleaf vegetation	Warm temperate humid
JP-Tak	2004	36° 80' N	137° 42' W	Deciduous broadleaf vegetation	cold wetn warm summer
KR_Har	2006	34° 33' N	126° 57' W	Aquatic	cold wetn warm summer
KR_Kw1	2006	37° 44' N	127° 16' W	Deciduous broadleaf vegetation	cold wetn warm summer
NL_Ca1	2006	51° 58' N	4° 92' W	Crops	Warm temperate humid
Nl_Hor	2006	52° 10' N	5° 67' W	Deciduous broadleaf vegetation	Warm temperate humid
NL_Loo	2005	52º 10' N	5º 74' W	Evergreen Needleaf vegetation	Warm temperate humid
PT_Mi2	2006	38° 28' N	8° 24' E	Grassland	Warm temperate
PT-Esp	2006	38° 38' N	8° 60' E	Grassland	Warm temperate
RU-Fyo	2006	56° 27' N	32° 92' W	Evergreen Needleaf vegetation	cold wetn warm summer
SE-Abi	2005	68° 21' N	18° 79' W	Grassland	Warm temperate humid
SE-Deg	2005	64° 10' N	19° 55' W	Evergreen Needleaf vegetation	Warm temperate humid
SE-Nor	2005	60°5' N	17° 47' W	Evergreen Needleaf vegetation	Warm temperate humid
SE-Sk1	2005	60° 7' N	17° 91' W	Evergreen Needleaf vegetation	Warm temperate humid
UK-ESa	2005	55° 51' N	3° 20' E	Crops	Warm temperate humid
UK-PL3	2006	51° 27' N	1° 26' E	Deciduous broadleaf vegetation	Warm temperate humid
US_Blo	2006	38°53' N	120º 63' E	Evergreen Needleaf vegetation	Warm temperate
US_IB1	2006	41° 51' N	88° 22' E	Crops	cold without dry season
US_IB2	2006	41° 50' N	88° 24' E	Crops	cold without dry season
US_KS2	2006	28° 36' N	80° 67' E	Shrub	Warm temperate humid
US_SP1	2005	29° 44' N	82° 21' E	Deciduous broadleaf vegetation	Warm temperate humid
US_SP2	2004	29°45' N	82°24' E	Deciduous broadleaf vegetation	Warm temperate humid
US-Bar	2005	44° 3' N	71° 28' E	Deciduous broadleaf vegetation	cold wet warm summer
US-CaV	2005	39° 3' N	79° 42' E	Crops	Warm temperate humid
US-Dk1	2005	35° 58' N	79° 93' E	Deciduous broadleaf vegetation	Warm temperate humid
US-Dk3	2005	35° 58' N	79° 94' E	Evergreen Broadleaf vegetation	Warm temperate humid
US-Fpe	2006	48° 18' N	105° 10' E	Grassland	Arid Steppe cold
US-Ha1	2006	42° 32' N	72°17' E	Deciduous broadleaf vegetation	Arid Steppe cold
US-Ho1	2003	45° 12' N	68° 74' E	Evergreen Needleaf vegetation	cold wet warm summer
US-Los	2005	46° 4' N	89° 97' E	Deciduous broadleaf vegetation	cold without dry season
US-LPH	2004	42° 32' N	72° 18' E	Deciduous broadleaf vegetation	cold without dry season
US-Me2	2005	44° 27' N	121° 55' E	Evergreen Needleaf vegetation	Warm temperate
US-Me3	2005	44° 18' N	121° 60' E	Evergreen Needleaf vegetation	Warm temperate
US-Me4	1999	44° 29' N	121° 62' E	Evergreen Needleaf vegetation	Warm temperate
US-MOz	2006	38° 44' N	92° 20' E	Deciduous broadleaf vegetation	Warm temperate
US-NC1	2006	35° 48' N	76° 71' E	Deciduous broadleaf vegetation	Temperate/wet
US-NC2	2006	35° 48' N	76° 66' E	Evergreen Needleaf vegetation	Temperate/wet
US-Ne1	2003	41° 9' N	96° 47' E	Crops	cold wetn warm summer
US-Oho	2005	41° 33' N	83° 84' E	Deciduous broadleaf vegetation	cold wetn warm summer
US-PFa	2003	45° 56' N	90° 27' E	deciduous broadleaf vegetation	cold wetn warm summer
US-SRM	2006	31°49' N	110° 86' E	Shrub	Arid Steppe cold
US-UMB	2003	45° 33' N	84°71' E	Deciduous broadleaf vegetation	cold wet warm summer
US-Var	2006	38° 24' N	120° 95' E	Shrub	Warm temperate
US-Wkg	2006	31° 44' N	109° 94' E	Grassland	Arid Steppe cold
VU-Coc	2003	15° 26' S	167° 19' W	Evergreen Broadleaf vegetation	Equatorial rainforest

## Sheet: validation
FLUXNET_ID	Year	Lat	Long	PFT	Climate
Validation
AU_Tum	2005	35° 39' S	148° 15' W	Evergreen broadleaf vegetation	Warm temperate humid
Br_Cax	2002	10° 43' S	51° 46' E	Evergreen broadleaf vegetation	Equatorial rainforest
BR-Sp1	2001	21° 37' S	47° 64' E	Evergreen broadleaf vegetation	Equatorial savannah
CA_Oas	2005	53° 37' N	106° 19' E	Decidious needleaf vegetation	cold humid cold summer
CA-Man	2003	55° 52' N	98° 48' E	Evergreen needleaf vegetation	cold humid cold summer
CN_Do1	2005	31° 31' N	121° 96' W	Aquatic	Warm temperate humid
CN_Do2	2005	42° 20' N	116° 28' W	Shrub	Warm temperate humid
CN_Do2	2005	49° 30' N	18° 53' W	Aquatic	Warm temperate humid
CZ_BK1	2005	49° 30' N	18° 53' W	Evergreen needleaf vegetation	Warm temperate humid
DE_Har	2005	47° 56' N	7° 60' W	Decidious broadleaf vegetation	Warm temperate humid
DE_Tha	2006	50° 57' N	13° 56' W	Evergreen needleaf vegetation	Warm temperate humid
DK-Ris	2005	55° 31' N	12°97' W	Crops	Warm temperate humid
ES-ES1	2006	39° 20' N	0° 31' W	Evergreen needleaf vegetation	Warm temperate humid
FR_Lq2	2006	45° 38' N	2° 73' W	Crops	Warm temperate humid
FR-Aur	2005	43° 32' N	1° 10' W	Crops	Warm temperate humid
ID_Pag	2003	2° 20' N	114° 36' W	Evergreen broadleaf vegetation	Equatorial rainforest
IE-Dri	2005	51° 59' N	8°75' E	Grassland	Warm temperate humid
IT-Cpz	2006	41° 42' N	12° 37' W	Evergreen needleaf vegetation	Warm temperate humid
JP_Mas	2003	36° 30' N	140° 27' W	Shrub	cold wet warm summer
NL_Mol	2006	51° 39' N	4° 63' W	Crops	Warm temperate humid
PT_Mi1	2005	38°32' N	8° 4' E	Grassland	Warm temperate humid
SE-Fla	2002	64° 6' N	19° 45' W	Evergreen needleaf vegetation	Warm temperate humid
SE-Sk2	2005	60° 7' N	17° 84' W	Evergreen needleaf vegetation	Warm temperate humid
UK_EBU		55° 51' N	3° 20' E	Grassland
US_Aud	2005	31° 35' N	110° 51' E	Shrub	Arid Steppe cold
US_SP3	2006	29° 45' N	82° 16' E	Evergreen broadleaf vegetation	Warm temperate humid
US-ARM	2005	36° 36' N	97° 48' E	Crops	Warm temperate humid
US-Atq	2006	70° 28' N	157° 40' E	Grassland	Polar
US-Bkg	2006	44° 20' N	96° 83' E	Crops	cold wet warm summer
US-B01	2005	40° 0' N	88° 17' W	Crops	Warm temperate humid
US-Dk2	2005	35° 58' N	79° 10' E	Decidious broadleaf vegetation	Warm temperate humid
US-Goo	2005	34° 15' N	89° 52' W	Decidious broadleaf vegetation	Warm temperate humid
US-MMS	2005	39° 19' N	86° 41' E	Decidious broadleaf vegetation	Warm temperate humid
US-NR1	2005	40° 1' N	105° 54' E	Evergreen needleaf vegetation	Warm temperate humid
US-SO2	2006	33° 22' N	116° 62' E	Shrub	Warm temperate dry
US-SO3	2006	33° 23' N	116° 63' E	Shrub	Warm temperate dry
US-SO4	2006	33° 23' N	116° 64' E	Shrub	Warm temperate dry
US-Syv	2003	46° 14' N	89° 34' E	Decidious broadleaf vegetation	cold wet warm summer
US-Ton	2006	38° 25' N	120° 96' E	Shrub	Warm temperate dry
US-Wrc	2004	45° 49' N	121° 95' E	Evergreen needleaf vegetation	Warm temperate dry
ZA-Kru	2002	25° 1' S	31° 49' W	Grassland	Arid steppe hot

## Sheet: compiled
FLUXNET_ID	Year	Lat	Long	PFT	Climate
Training
AU-How	2005	12° 29' S	131° 15' W	Deciduous broadleaf vegetation	Equatorial savannah
BE-Bra	2006	51° 18' N	4° 15' W	Deciduous broadleaf vegetation	Warm temperate humid
BE-Vie	2006	50° 18' N	5° 99' W	Deciduous broadleaf vegetation	Warm temperate humid
Br_Sa3	2002	3° 1' S	54° 98' E	Evergreen Broadleaf vegetation	Equatorial savannah
Br_Sa1	2002	2° 51' S	54° 96' E	Evergreen Broadleaf vegetation	Equatorial savannah
Br_Sal2	2001	3° 0' S	54° 55' E	Evergreen Broadleaf vegetation	Equatorial savannah
BR-Ban	2005	9° 49' S	50° 16' E	Evergreen Broadleaf vegetation	Equatorial savannah
BR-Ji2	2002	10° 4' S	61° 93' E	Evergreen Broadleaf vegetation	Equatorial savannah
BW-Ma1	2000	19° 54' S	23° 56' W	Grassland	Arid Steppe
CA_NSI	2004	55° 52' N	98° 48' E	Evergreen Needleaf vegetation	cold without dry season
CA-NS2	2003	55° 54' N	98° 52' E	Evergreen Needleaf vegetation	cold without dry season
CN-Hab	2004	37° 22' N	101° 18' W	Grassland	Polar tundra
DE_Kli	2005	50° 53' N	13° 52' W	Crops	Warm temperate humid
DE_Meh	2005	51° 16' N	10° 65' W	Crops	Warm temperate humid
DE_Wet	2006	50° 27' N	11° 45' W	Crops	Warm temperate humid
DE-Bay	1999	50° 80' N	11° 86' W	Evergreen Needleaf vegetation	Warm temperate humid
DE-Geb	2006	51° 60' N	10° 91' W	Crops	Warm temperate humid
DE-Gri	2006	50° 56' N	13° 51' W	Deciduous broadleaf vegetation	Warm temperate humid
DE-Hai	2006	51° 40' N	10° 45' W	Deciduous broadleaf vegetation	Warm temperate humid
DK-Fou	2005	56° 29' N	9° 58' W	Crops	Warm temperate humid
DK-Sor	2006	55°29' N	11° 64' W	Deciduous broadleaf vegetation	Warm temperate humid
ES_Lma	2005	39° 56' N	5° 77' E	Deciduous broadleaf vegetation	Warm temperate
ES-ES2	2006	39° 16' N	0° 31' W	Crops	Warm temperate
ES-VDA	2004	42° 90' N	1° 44' W	Shrub	Warm temperate
FI-Hyy	2006	61° 50' N	24° 29' W	Evergreen Needleaf vegetation	Warm temperate humid
FI-Sii	2005	61° 49' N	24° 19' W	Evergreen Needleaf vegetation	cold without dry season
FI-Sod	2006	67° 21' N	26° 63' W	Evergreen Needleaf vegetation	cold without dry season
FR_Gri	2005	48°50' N	1° 95' W	Crops	Warm temperate humid
Fr_Hes	2006	48° 40' N	7° 64' W	Deciduous broadleaf vegetation	Warm temperate humid
FR_Lbr	2005	44° 43' N	0°76' W	Shrub	Warm temperate humid
FR_Lq1	2006	45° 38' N	2° 73' W	Crops	Warm temperate humid
FR-Fon	2006	48° 28' N	2° 78' W	Deciduous broadleaf vegetation	Warm temperate humid
FR-Lam	2005	43° 29' N	1° 23' W	Crops	Warm temperate humid
GF-Guy	2006	5° 16' N	52° 92' E	Evergreen Broadleaf vegetation	Equatorial rainforest
HU-Bug	2006	46° 41' N	19° 60' W	Crops	Warm temperate humid
IE-Ca1	2004	52° 51' N	6° 91' E	Crops	Warm temperate humid
IL-Yat	2006	31° 20' N	35° 51' W	Shrub	Arid Steppe hot
IT-Amp	2006	41° 54' N	13° 60' W	Crops	Warm temperate humid
IT-Bci	2006	40° 31' N	14° 95' W	Crops	Warm temperate humid
IT-Col	2006	41° 50' N	13° 58' W	Deciduous broadleaf vegetation	Warm temperate humid
JP-Tak	2004	36° 80' N	137° 42' W	Deciduous broadleaf vegetation	cold wetn warm summer
KR_Har	2006	34° 33' N	126° 57' W	Aquatic	cold wetn warm summer
KR_Kw1	2006	37° 44' N	127° 16' W	Deciduous broadleaf vegetation	cold wetn warm summer
NL_Ca1	2006	51° 58' N	4° 92' W	Crops	Warm temperate humid
Nl_Hor	2006	52° 10' N	5° 67' W	Deciduous broadleaf vegetation	Warm temperate humid
NL_Loo	2005	52º 10' N	5º 74' W	Evergreen Needleaf vegetation	Warm temperate humid
PT_Mi2	2006	38° 28' N	8° 24' E	Grassland	Warm temperate
PT-Esp	2006	38° 38' N	8° 60' E	Grassland	Warm temperate
RU-Fyo	2006	56° 27' N	32° 92' W	Evergreen Needleaf vegetation	cold wetn warm summer
SE-Abi	2005	68° 21' N	18° 79' W	Grassland	Warm temperate humid
SE-Deg	2005	64° 10' N	19° 55' W	Evergreen Needleaf vegetation	Warm temperate humid
SE-Nor	2005	60°5' N	17° 47' W	Evergreen Needleaf vegetation	Warm temperate humid
SE-Sk1	2005	60° 7' N	17° 91' W	Evergreen Needleaf vegetation	Warm temperate humid
UK-ESa	2005	55° 51' N	3° 20' E	Crops	Warm temperate humid
UK-PL3	2006	51° 27' N	1° 26' E	Deciduous broadleaf vegetation	Warm temperate humid
US_Blo	2006	38°53' N	120º 63' E	Evergreen Needleaf vegetation	Warm temperate
US_IB1	2006	41° 51' N	88° 22' E	Crops	cold without dry season
US_IB2	2006	41° 50' N	88° 24' E	Crops	cold without dry season
US_KS2	2006	28° 36' N	80° 67' E	Shrub	Warm temperate humid
US_SP1	2005	29° 44' N	82° 21' E	Deciduous broadleaf vegetation	Warm temperate humid
US_SP2	2004	29°45' N	82°24' E	Deciduous broadleaf vegetation	Warm temperate humid
US-Bar	2005	44° 3' N	71° 28' E	Deciduous broadleaf vegetation	cold wet warm summer
US-CaV	2005	39° 3' N	79° 42' E	Crops	Warm temperate humid
US-Dk1	2005	35° 58' N	79° 93' E	Deciduous broadleaf vegetation	Warm temperate humid
US-Dk3	2005	35° 58' N	79° 94' E	Evergreen Broadleaf vegetation	Warm temperate humid
US-Fpe	2006	48° 18' N	105° 10' E	Grassland	Arid Steppe cold
US-Ha1	2006	42° 32' N	72°17' E	Deciduous broadleaf vegetation	Arid Steppe cold
US-Ho1	2003	45° 12' N	68° 74' E	Evergreen Needleaf vegetation	cold wet warm summer
US-Los	2005	46° 4' N	89° 97' E	Deciduous broadleaf vegetation	cold without dry season
US-LPH	2004	42° 32' N	72° 18' E	Deciduous broadleaf vegetation	cold without dry season
US-Me2	2005	44° 27' N	121° 55' E	Evergreen Needleaf vegetation	Warm temperate
US-Me3	2005	44° 18' N	121° 60' E	Evergreen Needleaf vegetation	Warm temperate
US-Me4	1999	44° 29' N	121° 62' E	Evergreen Needleaf vegetation	Warm temperate
US-MOz	2006	38° 44' N	92° 20' E	Deciduous broadleaf vegetation	Warm temperate
US-NC1	2006	35° 48' N	76° 71' E	Deciduous broadleaf vegetation	Temperate/wet
US-NC2	2006	35° 48' N	76° 66' E	Evergreen Needleaf vegetation	Temperate/wet
US-Ne1	2003	41° 9' N	96° 47' E	Crops	cold wetn warm summer
US-Oho	2005	41° 33' N	83° 84' E	Deciduous broadleaf vegetation	cold wetn warm summer
US-PFa	2003	45° 56' N	90° 27' E	deciduous broadleaf vegetation	cold wetn warm summer
US-SRM	2006	31°49' N	110° 86' E	Shrub	Arid Steppe cold
US-UMB	2003	45° 33' N	84°71' E	Deciduous broadleaf vegetation	cold wet warm summer
US-Var	2006	38° 24' N	120° 95' E	Shrub	Warm temperate
US-Wkg	2006	31° 44' N	109° 94' E	Grassland	Arid Steppe cold
VU-Coc	2003	15° 26' S	167° 19' W	Evergreen Broadleaf vegetation	Equatorial rainforest
Validation
AU_Tum	2005	35° 39' S	148° 15' W	Evergreen broadleaf vegetation	Warm temperate humid
Br_Cax	2002	10° 43' S	51° 46' E	Evergreen broadleaf vegetation	Equatorial rainforest
BR-Sp1	2001	21° 37' S	47° 64' E	Evergreen broadleaf vegetation	Equatorial savannah
CA_Oas	2005	53° 37' N	106° 19' E	Decidious needleaf vegetation	cold humid cold summer
CA-Man	2003	55° 52' N	98° 48' E	Evergreen needleaf vegetation	cold humid cold summer
CN_Do1	2005	31° 31' N	121° 96' W	Aquatic	Warm temperate humid
CN_Do2	2005	42° 20' N	116° 28' W	Shrub	Warm temperate humid
CN_Do2	2005	49° 30' N	18° 53' W	Aquatic	Warm temperate humid
CZ_BK1	2005	49° 30' N	18° 53' W	Evergreen needleaf vegetation	Warm temperate humid
DE_Har	2005	47° 56' N	7° 60' W	Decidious broadleaf vegetation	Warm temperate humid
DE_Tha	2006	50° 57' N	13° 56' W	Evergreen needleaf vegetation	Warm temperate humid
DK-Ris	2005	55° 31' N	12°97' W	Crops	Warm temperate humid
ES-ES1	2006	39° 20' N	0° 31' W	Evergreen needleaf vegetation	Warm temperate humid
FR_Lq2	2006	45° 38' N	2° 73' W	Crops	Warm temperate humid
FR-Aur	2005	43° 32' N	1° 10' W	Crops	Warm temperate humid
ID_Pag	2003	2° 20' N	114° 36' W	Evergreen broadleaf vegetation	Equatorial rainforest
IE-Dri	2005	51° 59' N	8°75' E	Grassland	Warm temperate humid
IT-Cpz	2006	41° 42' N	12° 37' W	Evergreen needleaf vegetation	Warm temperate humid
JP_Mas	2003	36° 30' N	140° 27' W	Shrub	cold wet warm summer
NL_Mol	2006	51° 39' N	4° 63' W	Crops	Warm temperate humid
PT_Mi1	2005	38°32' N	8° 4' E	Grassland	Warm temperate humid
SE-Fla	2002	64° 6' N	19° 45' W	Evergreen needleaf vegetation	Warm temperate humid
SE-Sk2	2005	60° 7' N	17° 84' W	Evergreen needleaf vegetation	Warm temperate humid
UK_EBU		55° 51' N	3° 20' E	Grassland
US_Aud	2005	31° 35' N	110° 51' E	Shrub	Arid Steppe cold
US_SP3	2006	29° 45' N	82° 16' E	Evergreen broadleaf vegetation	Warm temperate humid
US-ARM	2005	36° 36' N	97° 48' E	Crops	Warm temperate humid
US-Atq	2006	70° 28' N	157° 40' E	Grassland	Polar
US-Bkg	2006	44° 20' N	96° 83' E	Crops	cold wet warm summer
US-B01	2005	40° 0' N	88° 17' W	Crops	Warm temperate humid
US-Dk2	2005	35° 58' N	79° 10' E	Decidious broadleaf vegetation	Warm temperate humid
US-Goo	2005	34° 15' N	89° 52' W	Decidious broadleaf vegetation	Warm temperate humid
US-MMS	2005	39° 19' N	86° 41' E	Decidious broadleaf vegetation	Warm temperate humid
US-NR1	2005	40° 1' N	105° 54' E	Evergreen needleaf vegetation	Warm temperate humid
US-SO2	2006	33° 22' N	116° 62' E	Shrub	Warm temperate dry
US-SO3	2006	33° 23' N	116° 63' E	Shrub	Warm temperate dry
US-SO4	2006	33° 23' N	116° 64' E	Shrub	Warm temperate dry
US-Syv	2003	46° 14' N	89° 34' E	Decidious broadleaf vegetation	cold wet warm summer
US-Ton	2006	38° 25' N	120° 96' E	Shrub	Warm temperate dry
US-Wrc	2004	45° 49' N	121° 95' E	Evergreen needleaf vegetation	Warm temperate dry
ZA-Kru	2002	25° 1' S	31° 49' W	Grassland	Arid steppe hot
